# Supplementary material for: Fluorogenic naked eye “turn-on” sensing of hypochlorous acid by a Zr-based metal organic framework
Source: Royal Society of Chemistry journal article supplement (doi:10.1039/d1nj02405a), 2021-01-01
Supplement: d1nj02405a1.pdf [file d1nj02405a1.pdf]

**Supporting Information For**  
**Fluorogenic naked eye “turn-on” sensing of hypochlorous acid by a Zr-**  
**based metal-organic framework**

*Soutick Nandi,<sup>ab</sup> Subhrajyoti Ghosh,<sup>a</sup> Mostakim SK,<sup>a</sup> and Shyam Biswas<sup>\*a</sup>*

*<sup>a</sup> Department of Chemistry, Indian Institute of Technology Guwahati, Guwahati, 781039 Assam, India.*

*<sup>b</sup> Department of Chemistry, Brainware University, Kolkata, 700125 West Bengal, India.*

*\* Corresponding author. Tel: 91-3612583309, Fax: 91-3612582349.*

*E-mail address: sbiswas@iitg.ac.in.*

**Materials and Characterization Methods.** All the required chemicals were purchased from commercial sources and used without purification, except 2-((dimethylthiocarbamoyl)oxy) terephthalic acid (H<sub>2</sub>BDC-DMTCM). Fourier transform infrared (FT-IR) spectra were recorded with a Perkin Elmer Spectrum two FT-IR spectrometer in the range of 440-4000 cm<sup>-1</sup> with KBr pellet. The below mentioned indications were employed for the characterization of the absorption bands: medium (m), weak (w), broad (br), very strong (vs), strong (s) and shoulder (sh). X-Ray powder diffraction (XRPD) patterns were collected by Rigaku Smartlab X-ray diffractometer with copper K $\alpha$  ( $\lambda = 1.54 \text{ \AA}$ ) as the source recorded with a scan rate of 5°/s between 2 $\theta$  (5-50°) with 9 kW power. FE-SEM images were captured with a Zeiss (Zemini) scanning electron microscope. Thermogravimetric analyses (TGA) were collected under air atmosphere at a heating rate of 10 °C min<sup>-1</sup> in a temperature region of 25-800 °C by employing a Netzsch STA-409CD thermal analyzer. Fluorescence emission behavior was recorded by a HORIBA JOBIN YVON Fluoromax-4 spectrofluorometer. The excitation wavelength ( $\lambda_{\text{ex}}$ ) was 305 nm for all the fluorescence experiments. The nitrogen sorption isotherms were performed employing a Quantachrome Autosorb iQ-MP gas sorption analyzer at -196 °C. Prior to the sorption measurement, degassing of the material was performed at 90 °C for 12 h under dynamic vacuum. A Bruker Avance III 600 spectrometer was utilized for recording <sup>1</sup>H-NMR at 400 MHz. The mass spectrum (in ESI mode) was measured with an Agilent 6520 Q-TOF high-resolution mass spectrometer. Fluorescence lifetime measurements were performed by time correlated single-photon counting (TCSPC) method by an Edinburgh Instrument Life-Spec II instrument. The fluorescence decays were analyzed by reconvolution method using the FAST software provided by Edinburgh Instruments.

**Preparation of 2-((dimethylthiocarbamoyl)oxy) terephthalic acid (H<sub>2</sub>BDC-DMTCM).** 2-((dimethylthiocarbamoyl)oxy) terephthalic acid (H<sub>2</sub>BDC-DMTCM) was prepared by the hydrolysis of its corresponding dimethyl ester compound (Scheme S1). Dimethyl 2-((dimethylthiocarbamoyl)oxy) terephthalate was prepared by following similar reported procedure, which was adopted for 2,5-bis((dimethylthiocarbamoyl)oxy)terephthalic acid diethyl ester.<sup>1</sup> The hydrolysis of the ester compound was carried out by the following method. In 40 mL of methanol, 1 g (3.5 mmol) of dimethyl 2-((dimethylthiocarbamoyl)oxy) terephthalate was dissolved. Afterward, 14 mL of 1 (N) NaOH was added dropwise. The mixture was kept for 12 h under stirring condition. Then, the solution was filtered and conc. HCl was added to reach pH = 3. Then, the methanol was evaporated and the solution was kept at 4 °C. After 3 h, white precipitate was collected and dried at 60 °C for 12 h in a conventional oven. Yield was 620 mg (2.3 mmol, 65 %). <sup>1</sup>H-NMR (400 MHz, DMSO-*d*<sub>6</sub>):  $\delta = 3.35$  (s, 6H), 7.98-7.96 (d, 1H), 7.89-7.86 (d, 1H), 7.59 (s, 1H) ppm. <sup>13</sup>C NMR (100 MHz, DMSO-*d*<sub>6</sub>):  $\delta = 185.98, 165.99, 165.00, 152.87, 134.90, 131.43, 129.01, 126.43, 125.38, 42.86$  ppm. ESI-MS (m/z): 268.0396 for (M-H)<sup>-</sup> ion (M = mass of H<sub>2</sub>BDC-DMTCM ligand). In Figures S1-S3 the NMR and mass spectra of the H<sub>2</sub>BDC-DMTCM ligand are shown.

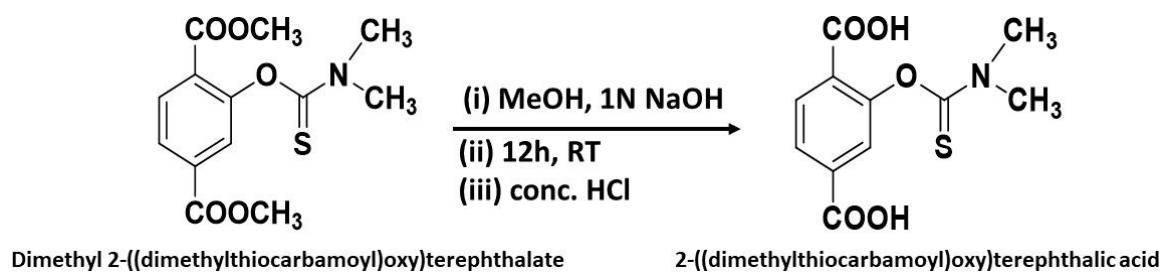

**Scheme S1.** Scheme for the preparation of 2-((dimethylthiocarbamoyl)oxy) terephthalic acid (H<sub>2</sub>BDC-DMTCM).

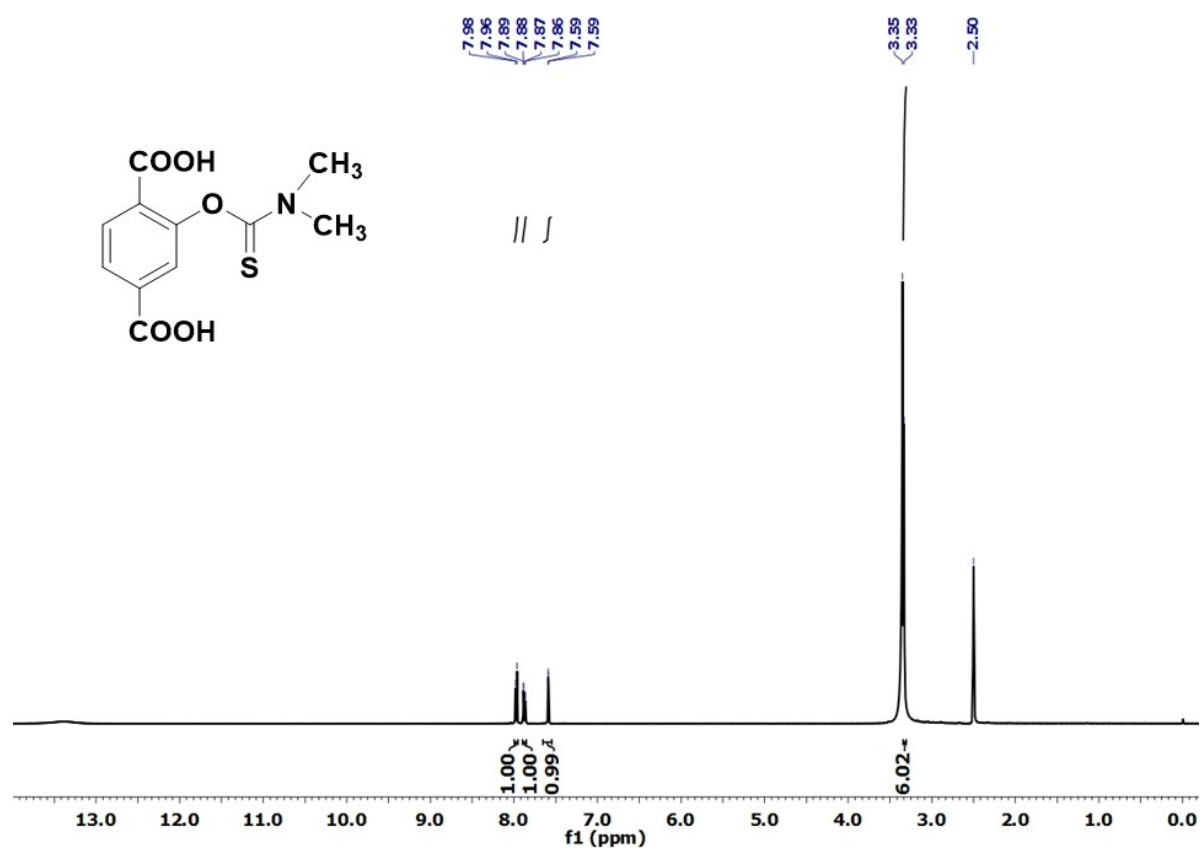

**Figure S1.** <sup>1</sup>H NMR spectrum of 2-((dimethylthiocarbamoyl)oxy) terephthalic acid (H<sub>2</sub>BDC-DMTCM) ligand.

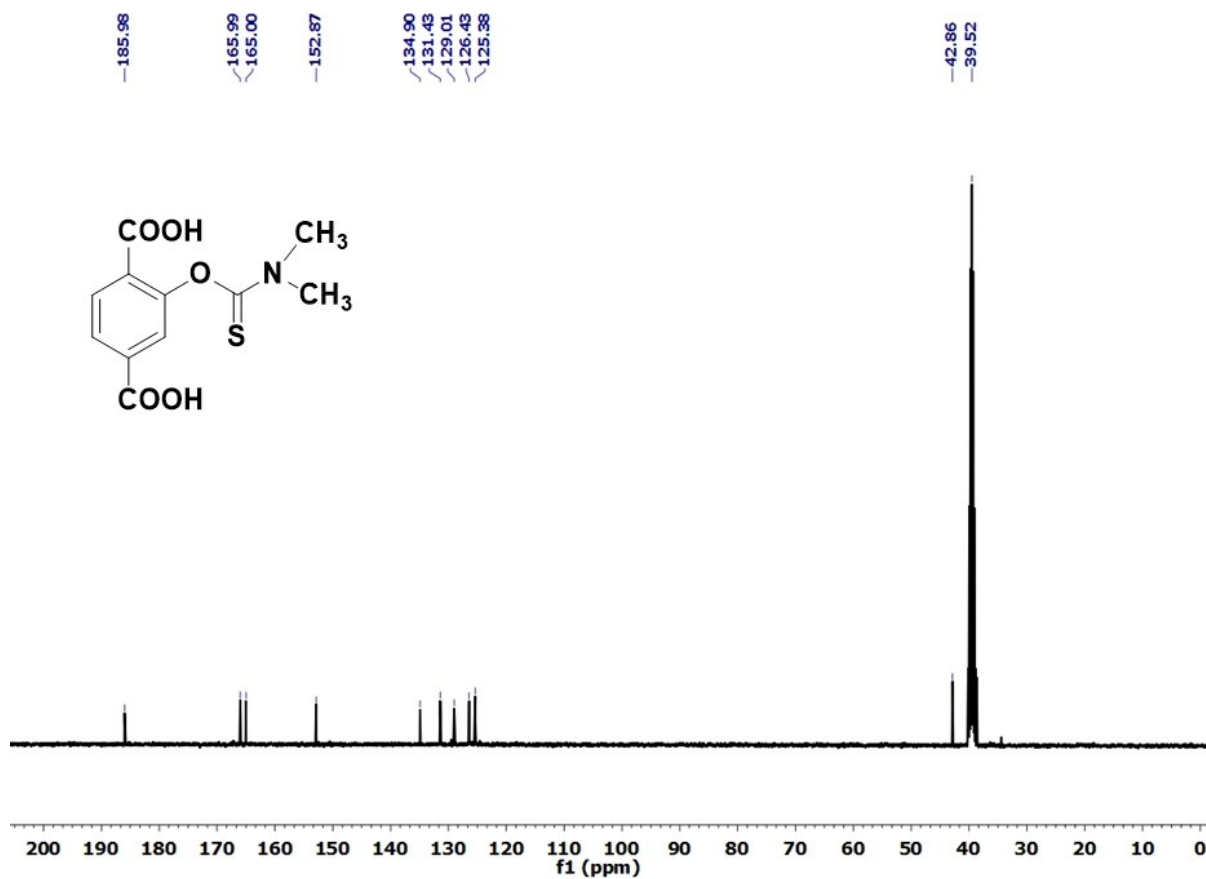

**Figure S2.** <sup>13</sup>C NMR spectrum of 2-((dimethylthiocarbamoyl)oxy) terephthalic acid (H<sub>2</sub>BDC-DMTCM) ligand.

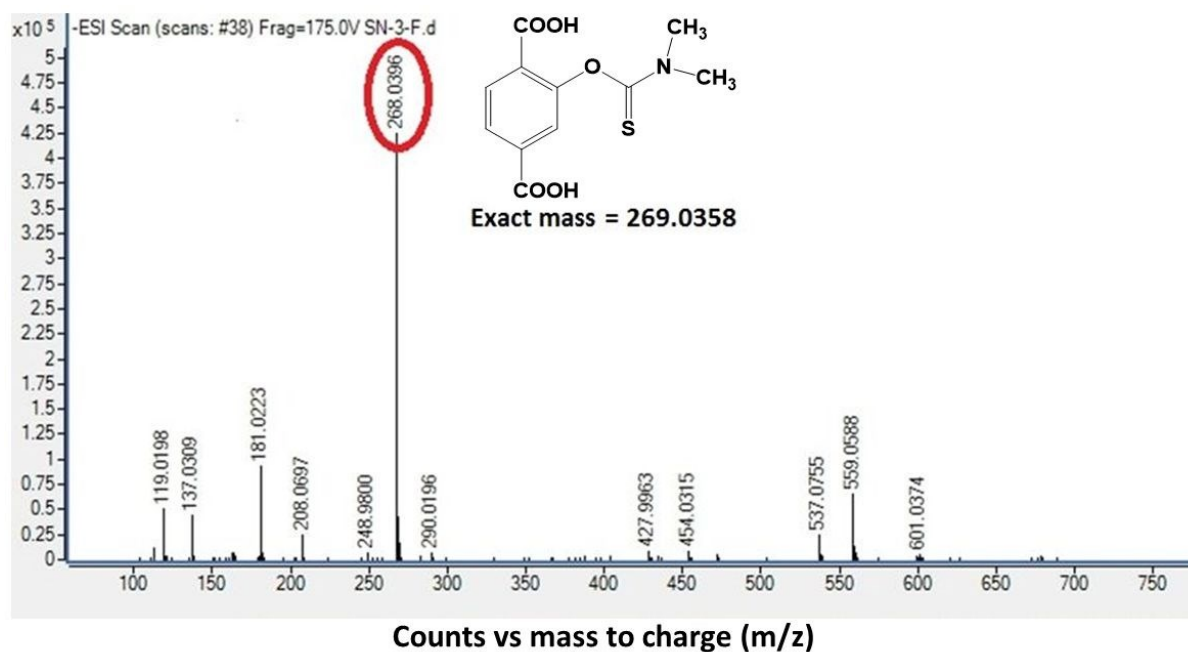

**Figure S3.** ESI-MS spectrum of 2-((dimethylthiocarbamoyl)oxy) terephthalic acid (H<sub>2</sub>BDC-DMTCM) ligand.

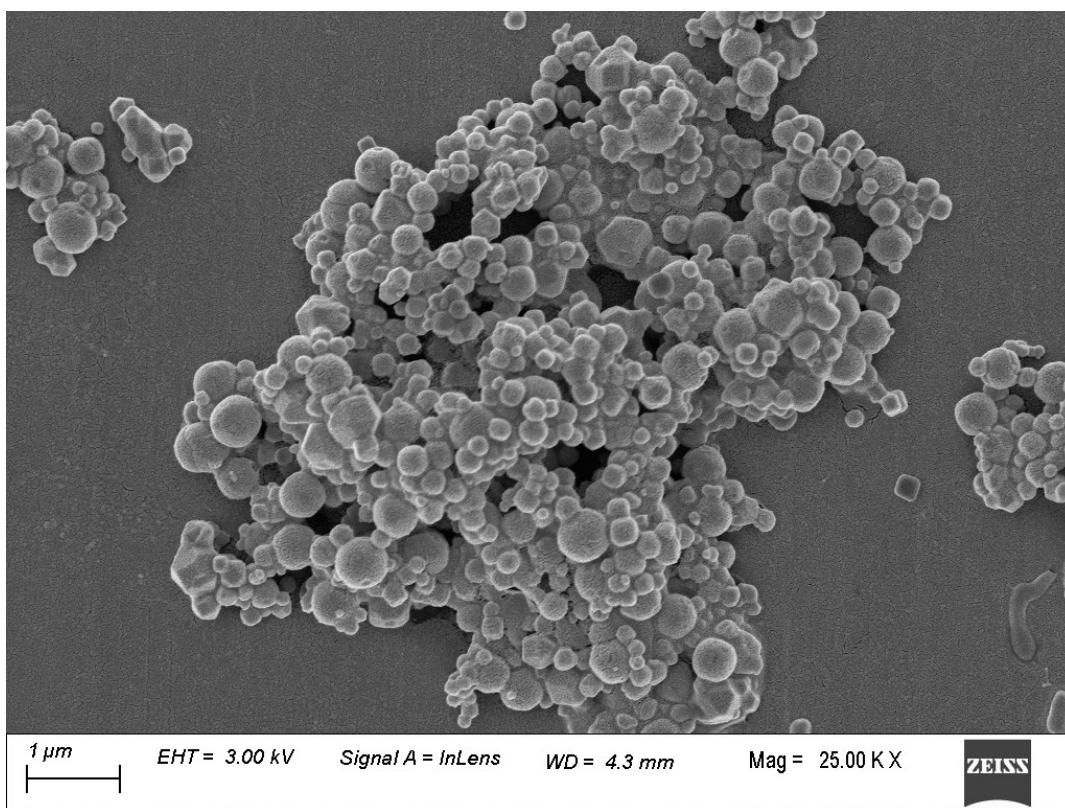

Figure S4. FE-SEM images of 1'.

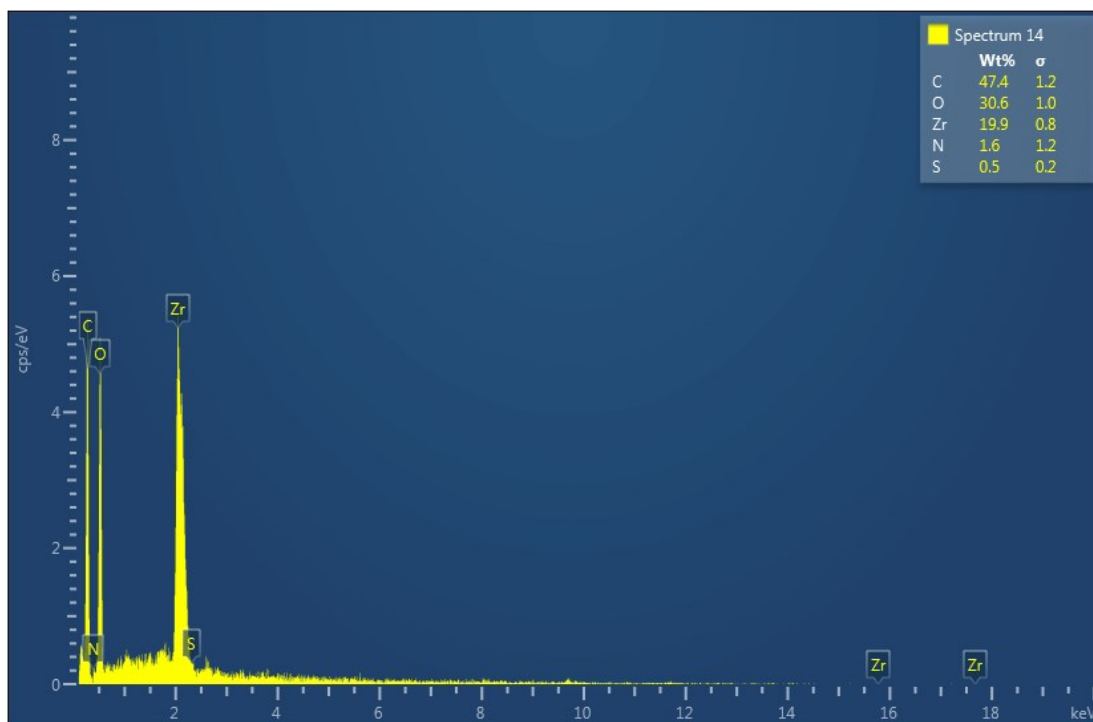

Figure S5. EDX spectrum of 1'.

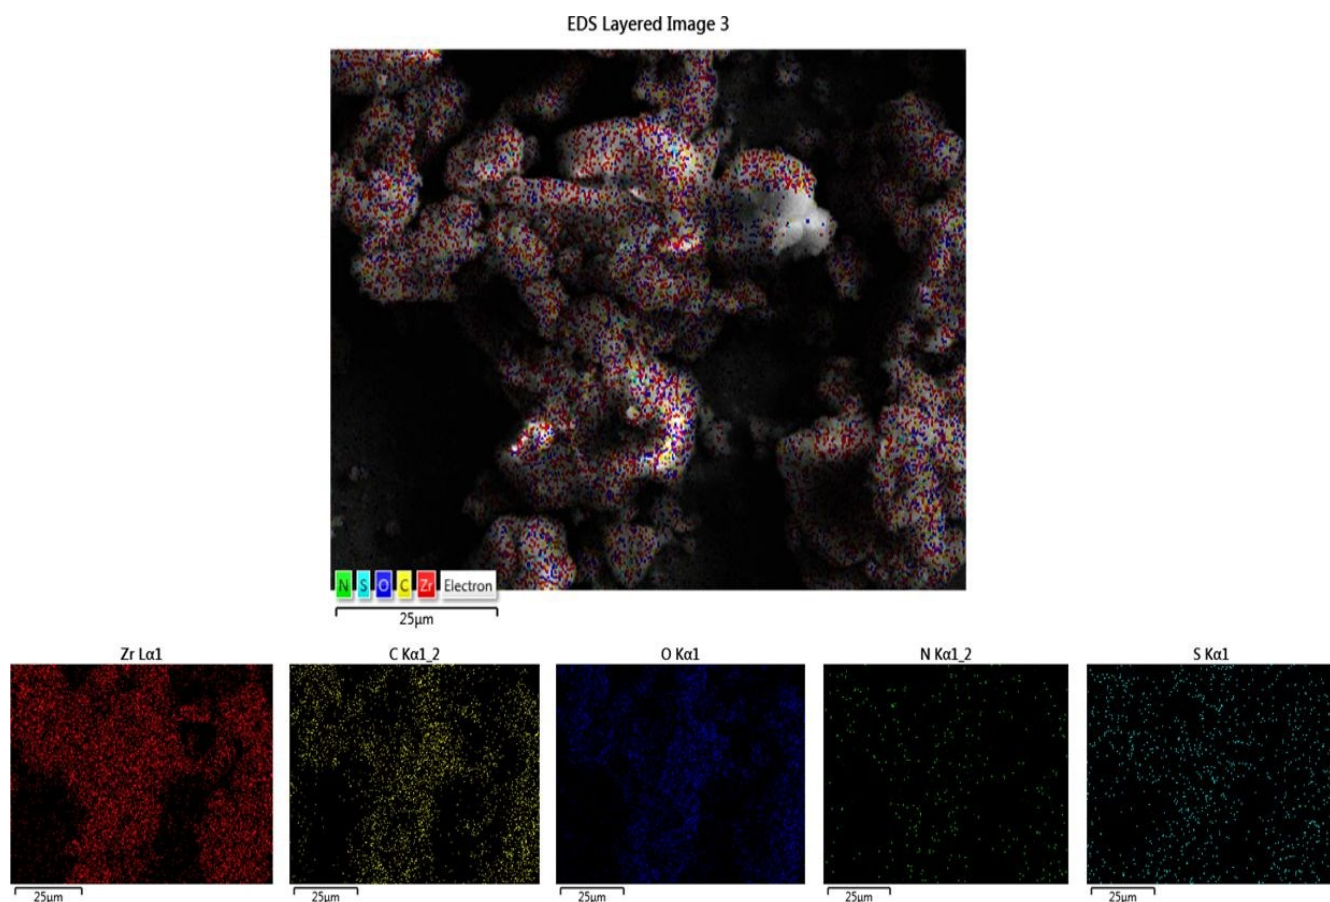

**Figure S6.** EDX elemental mapping of **1'**.

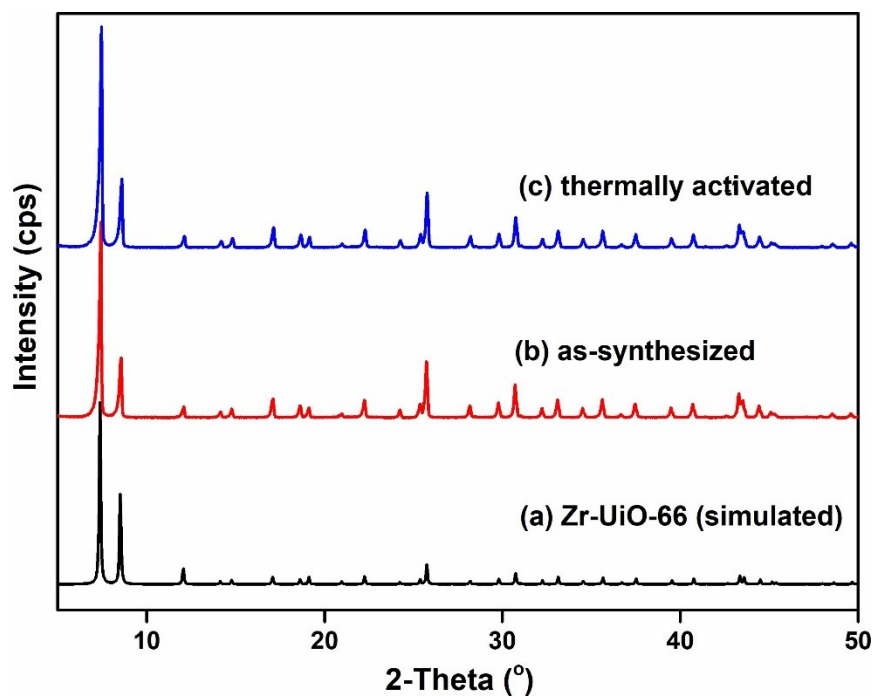

**Figure S7.** XRPD pattern of the simulated Zr-UiO-66 (black), as-synthesized **1** (red) and thermally activated (blue) **1'**.



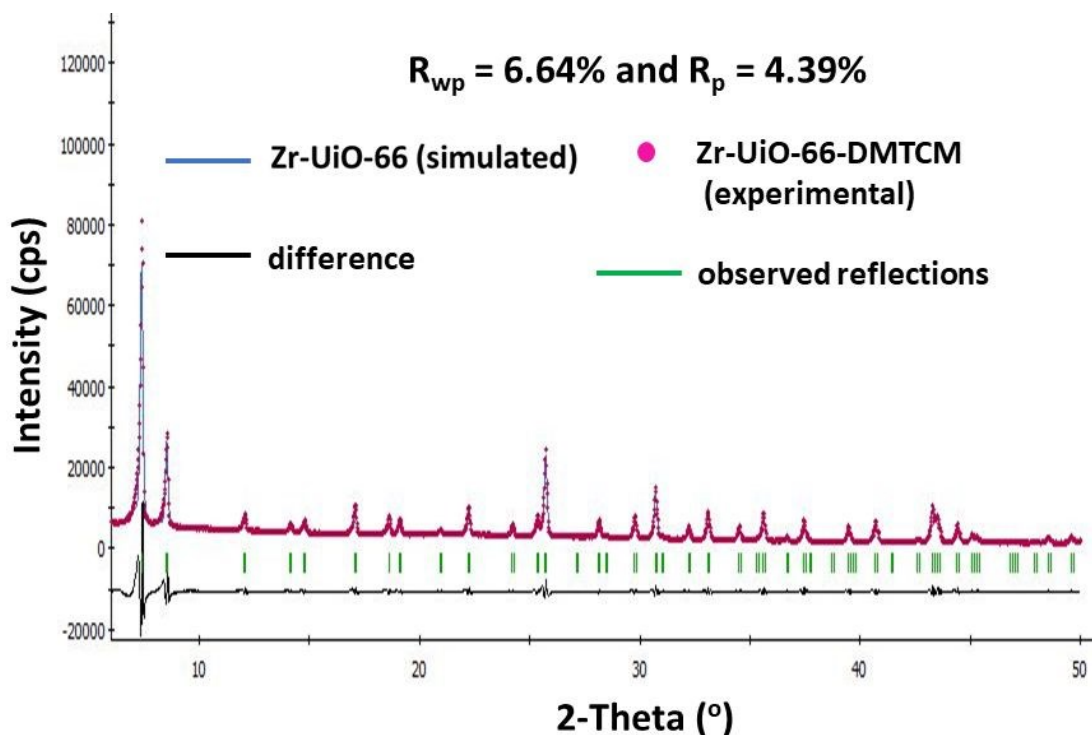

**Figure S8.** Pawley refinement for the XRPD pattern of as-synthesized **1**. Pink characters and blues lines denote experimental and simulated patterns, respectively. The peak positions and difference plot are shown at the bottom ( $R_{wp} = 6.64\%$ ,  $R_p = 4.39\%$ ).

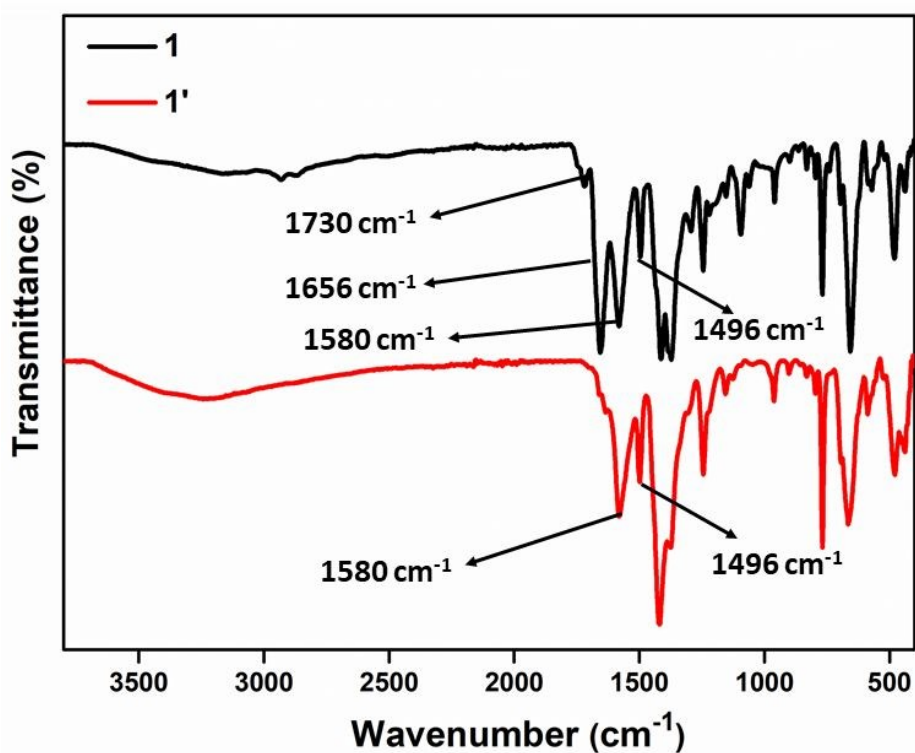

**Figure S9.** FT-IR spectra of as-synthesized **1** and thermally activated **1'**.

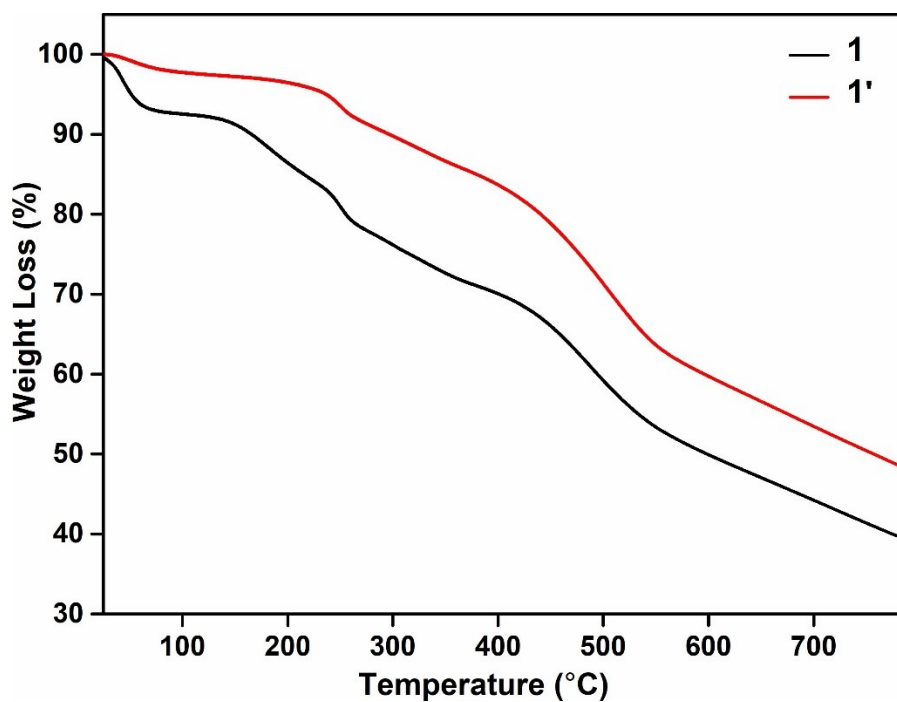

**Figure S10.** TG curves of as-synthesized and activated material measured in the temperature range of 25-700 °C at a heating rate of 5 °C min<sup>-1</sup>.

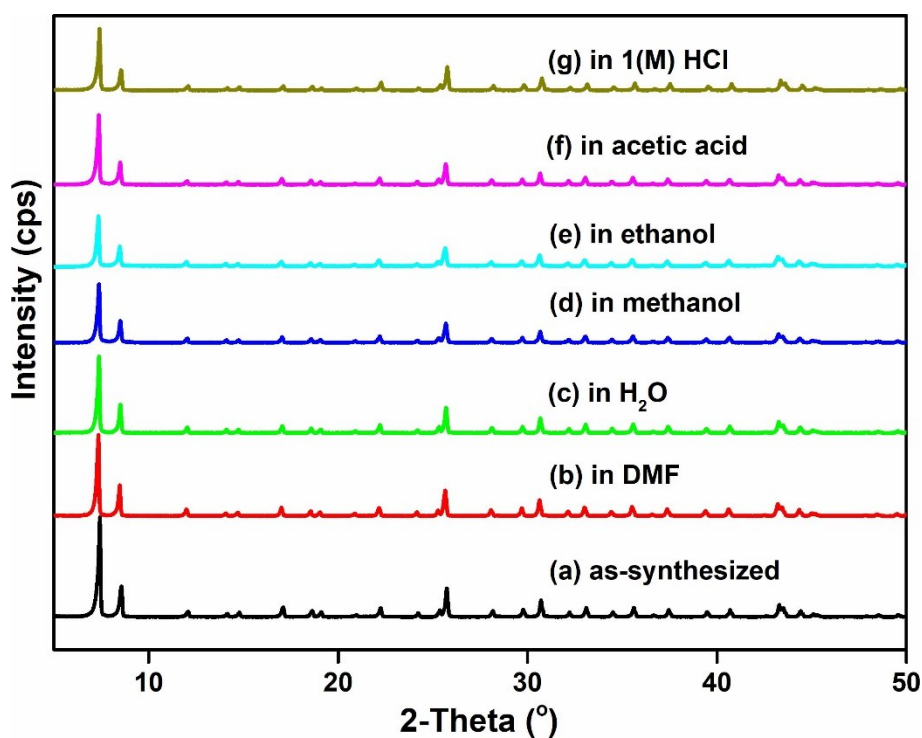

**Figure S11.** Experimental XRPD patterns of as-synthesized **1** (a), in DMF (b), in H<sub>2</sub>O (c), in methanol (d), in ethanol (e) acetic acid (f) and 1(M) HCl (g).



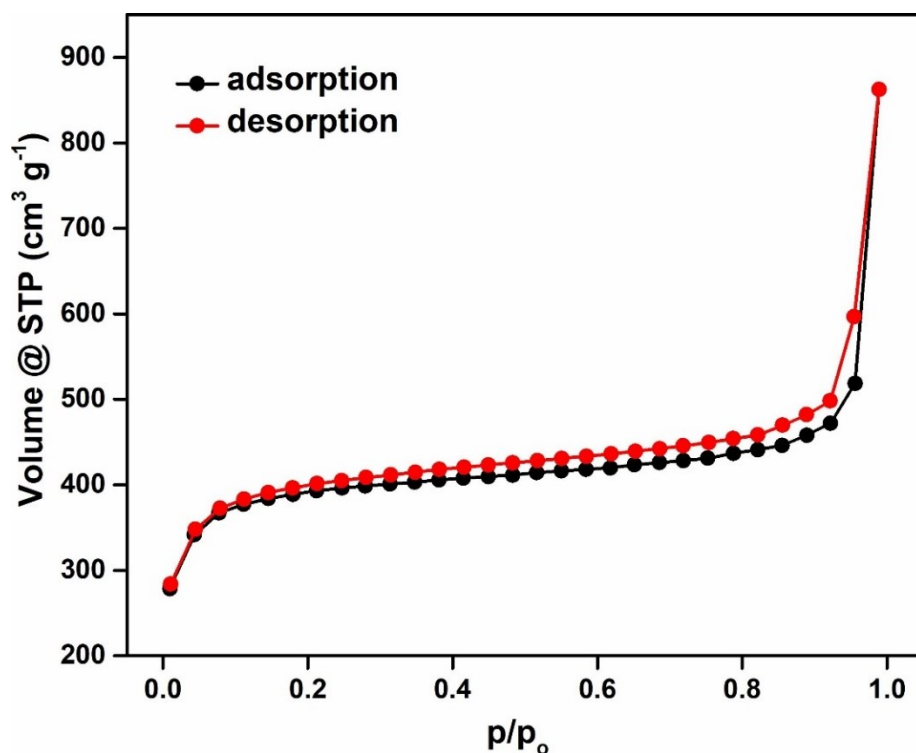

**Figure S12.** N<sub>2</sub> adsorption (solid black circles) and desorption (solid red circles) isotherms of activated **1'** measured at -196 °C.

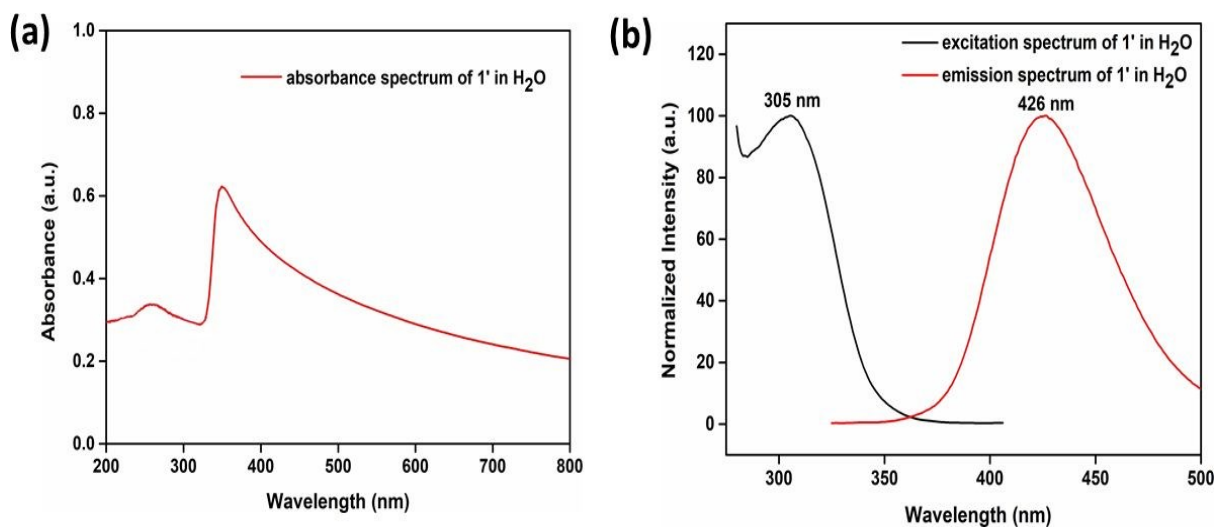

**Figure S13.** (a) UV-Vis spectrum and (b) fluorescence spectra (excitation and emission) of **1'** in aqueous medium.

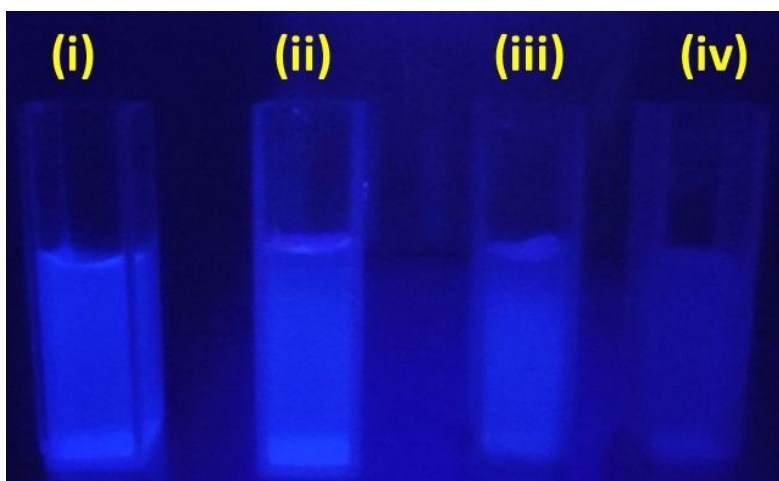

**Figure S14.** Naked eye detectable color change under UV lamp with the inclusion of (i) 20  $\mu\text{M}$  (ii) 6  $\mu\text{M}$  (iii) 3  $\mu\text{M}$  (iv) 0  $\mu\text{M}$  (blank) concentration of HOCl in aqueous suspension of **1'**.

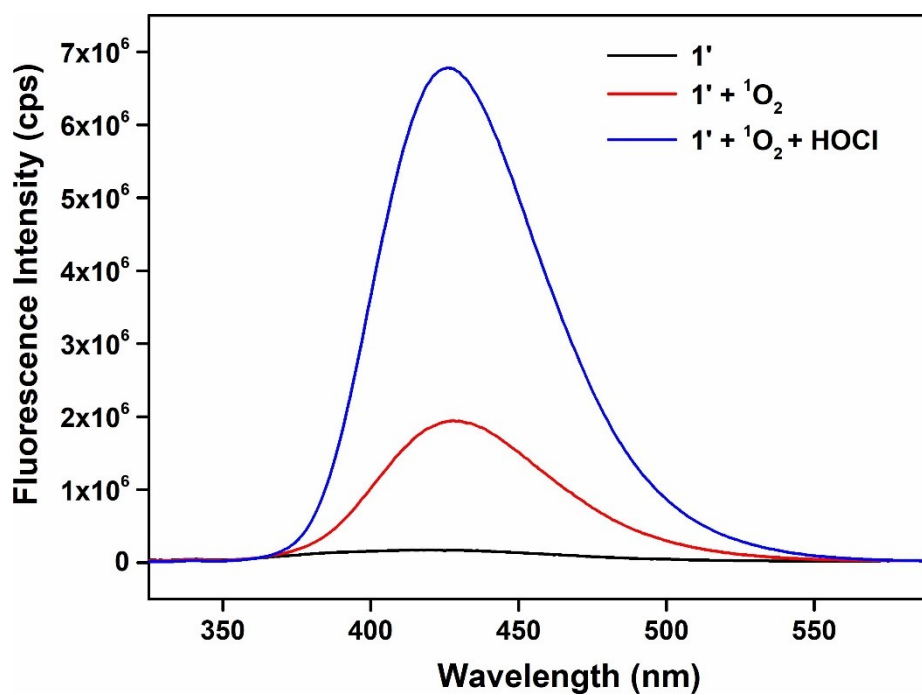

**Figure S15.** Change in the fluorescence emission intensity of **1'** upon addition of 1 mM HOCl solution (500  $\mu\text{L}$ ) in presence of 1 mM  $^1\text{O}_2$  solution (500  $\mu\text{L}$ ).

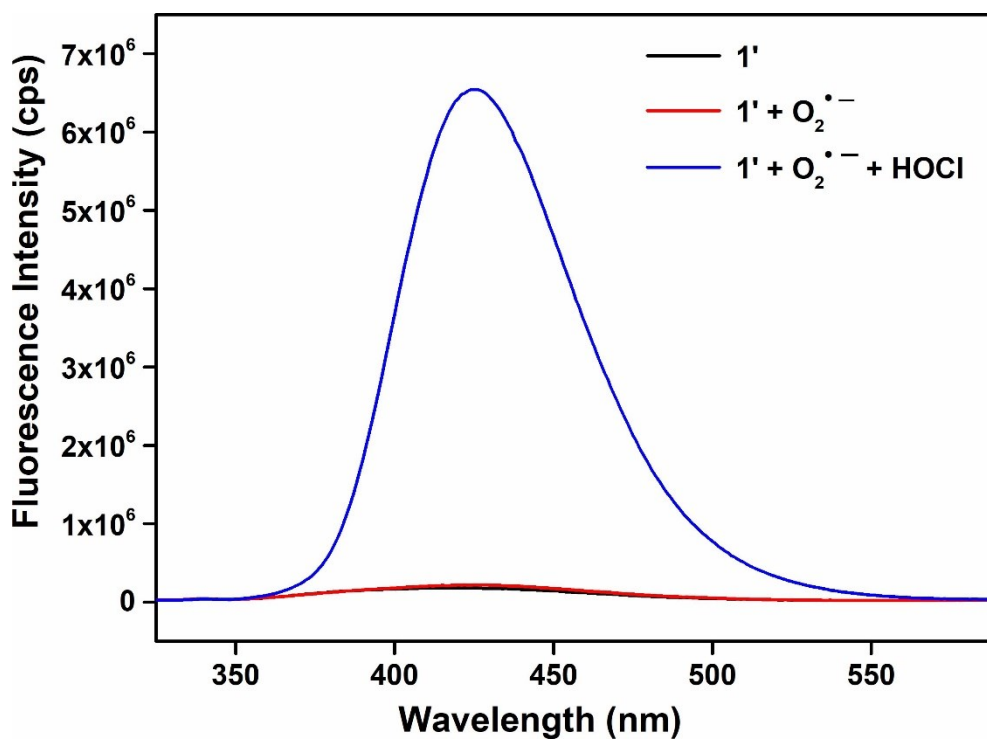

**Figure S16.** Change in the fluorescence emission intensity of **1'** upon addition of 1 mM HOCl solution (500  $\mu$ L) in presence of 1 mM  $O_2^{\bullet-}$  solution (500  $\mu$ L).

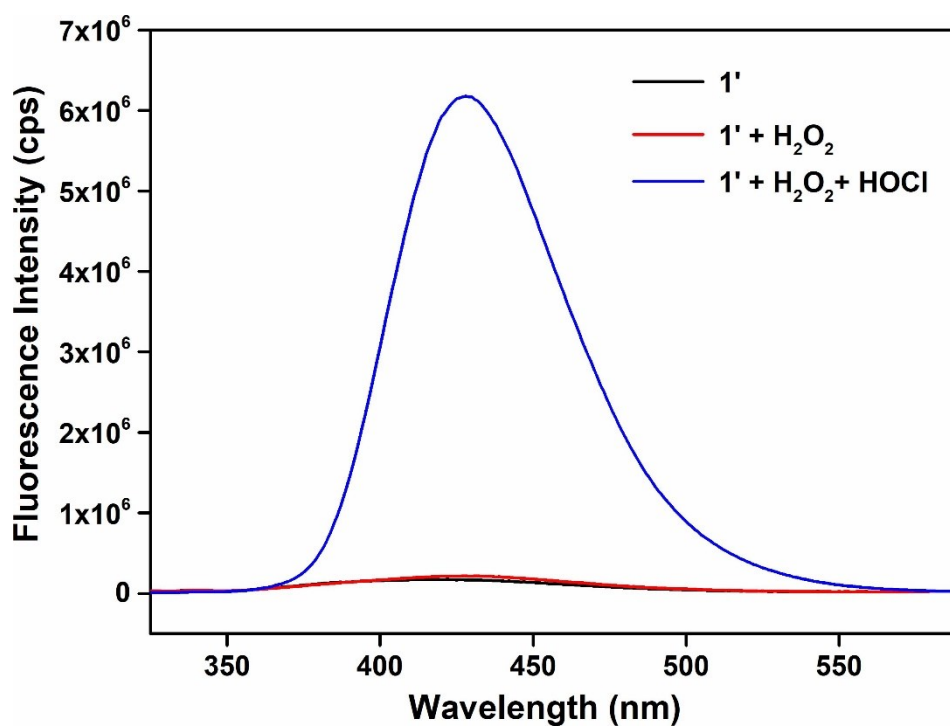

**Figure S17.** Change in the fluorescence emission intensity of **1'** upon addition of 1 mM HOCl solution (500  $\mu$ L) in presence of 1 mM  $H_2O_2$  solution (500  $\mu$ L).

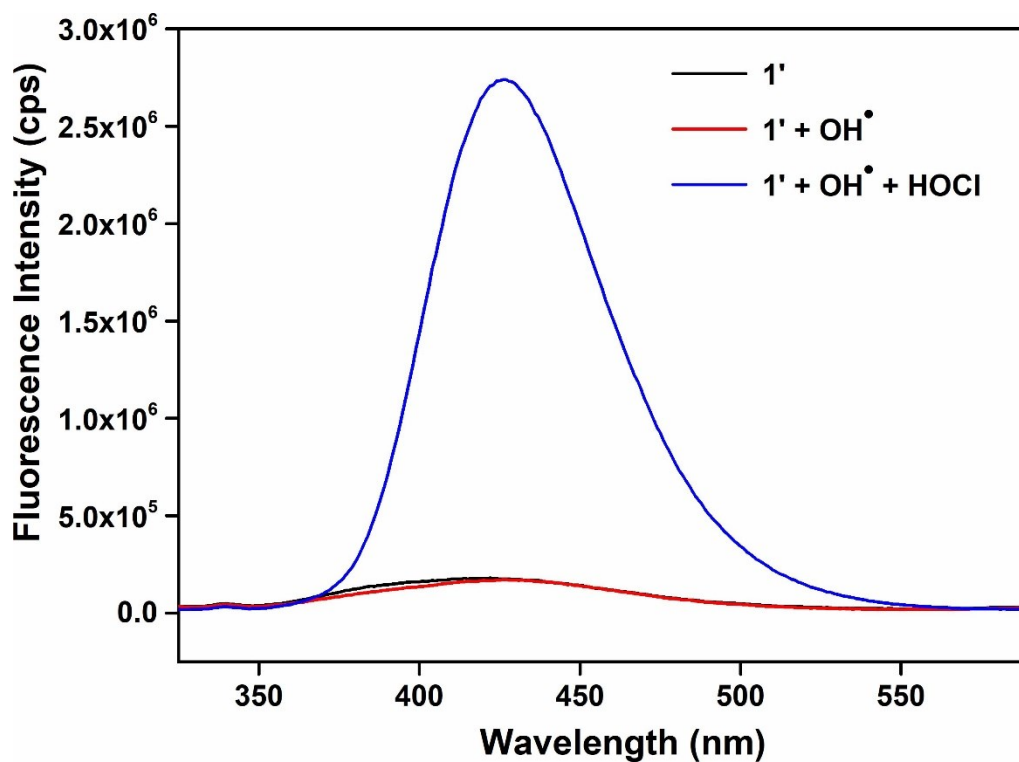

**Figure S18.** Change in the fluorescence emission intensity of 1' upon addition of 1 mM HOCl solution (500  $\mu$ L) in presence of 1 mM OH $\cdot$  solution (500  $\mu$ L).

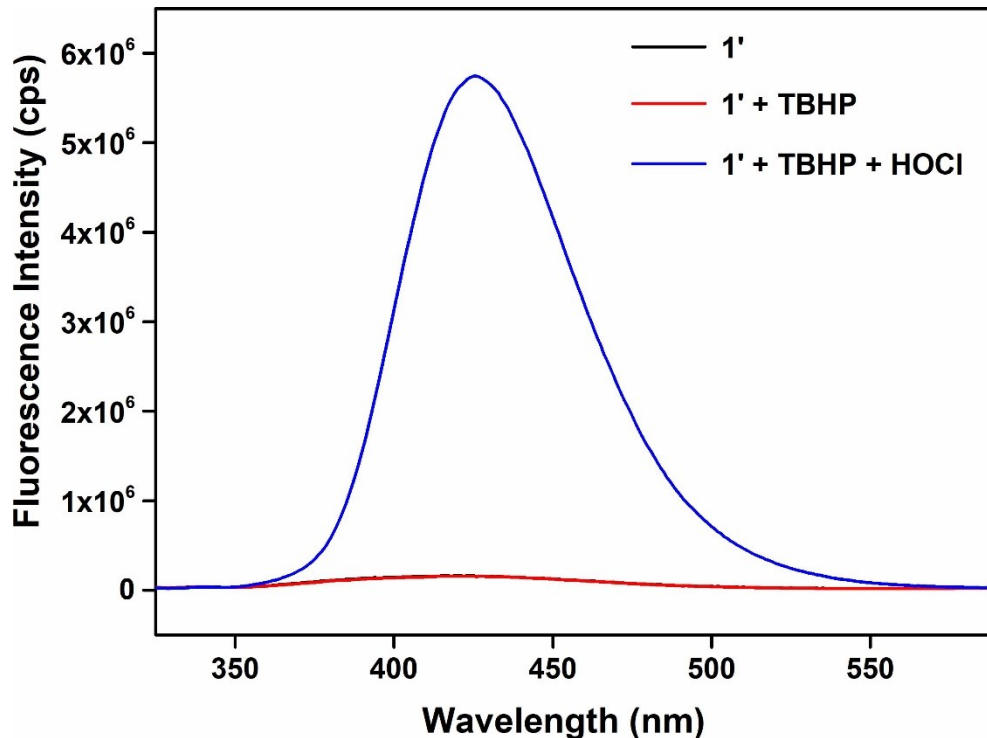

**Figure S19.** Change in the fluorescence emission intensity of 1' upon addition of 1 mM HOCl solution (500  $\mu$ L) in presence of 1 mM TBHP solution (500  $\mu$ L).

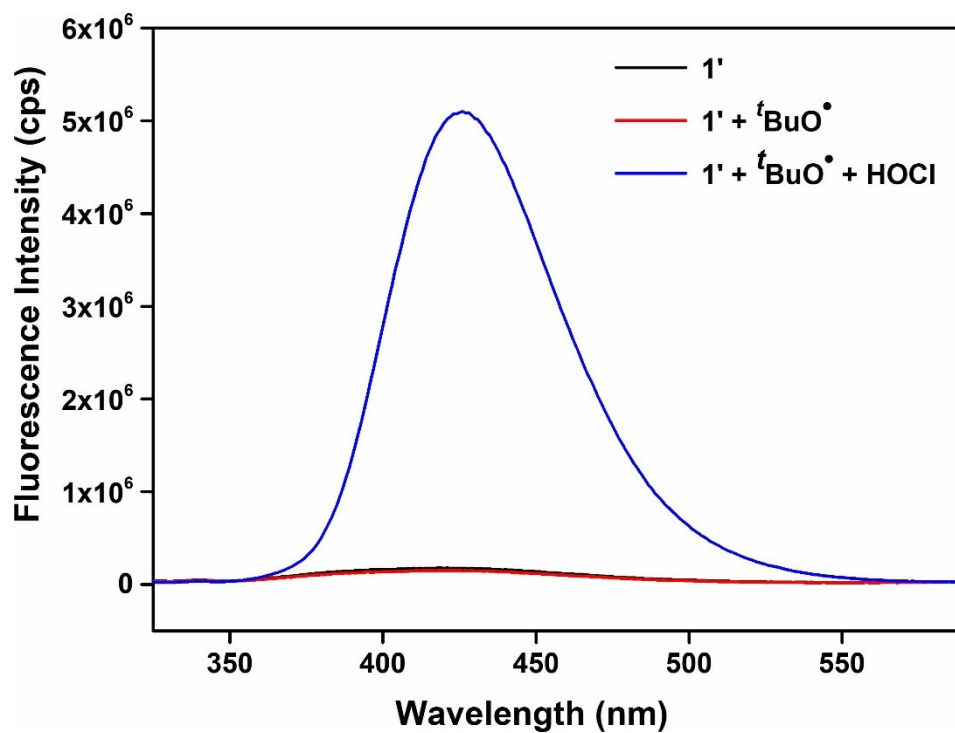

**Figure S20.** Change in the fluorescence emission intensity of **1'** upon addition of 1 mM HOCl solution (500  $\mu$ L) in presence of 1 mM <sup>t</sup>BuO• solution (500  $\mu$ L).

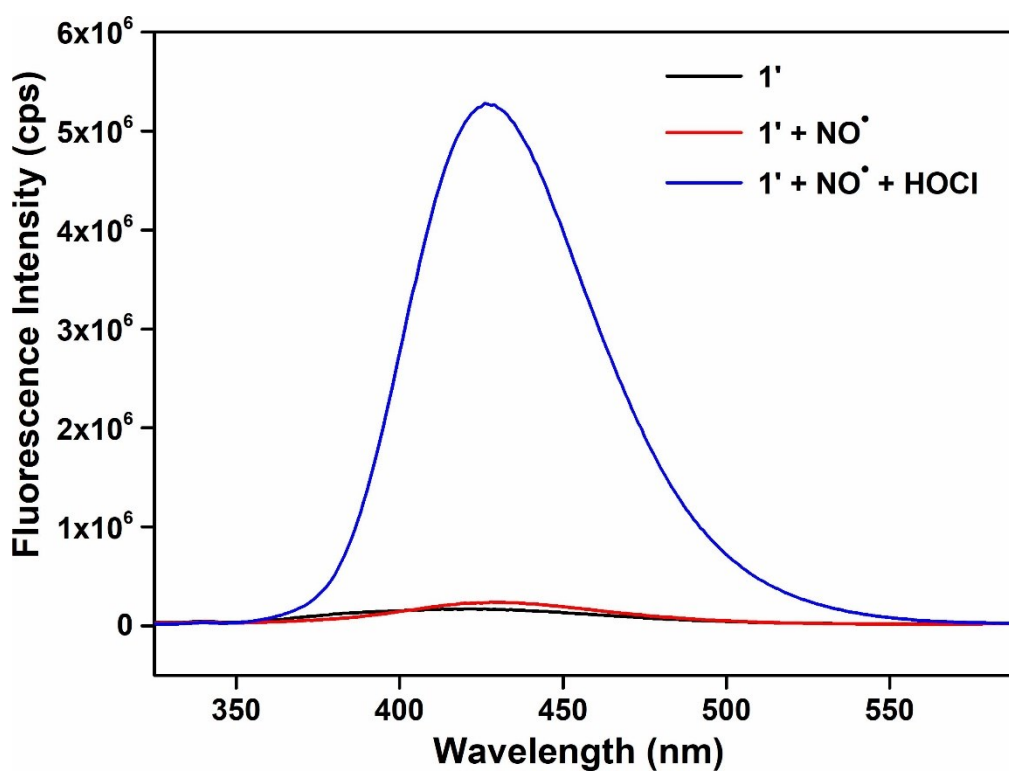

**Figure S21.** Change in the fluorescence emission intensity of **1'** upon addition of 1 mM HOCl solution (500  $\mu$ L) in presence of 1 mM NO• solution (500  $\mu$ L).

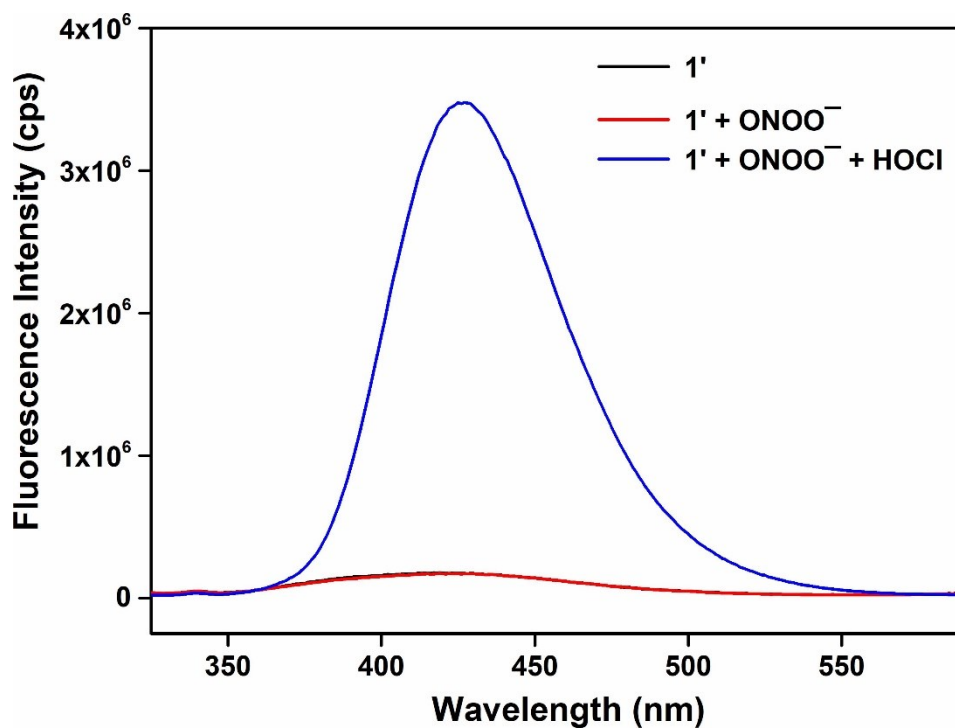

**Figure S22.** Change in the fluorescence emission intensity of  $1'$  upon addition of 1 mM HOCl solution (500  $\mu\text{L}$ ) in presence of 1 mM  $\text{ONOO}^-$  solution (500  $\mu\text{L}$ ).

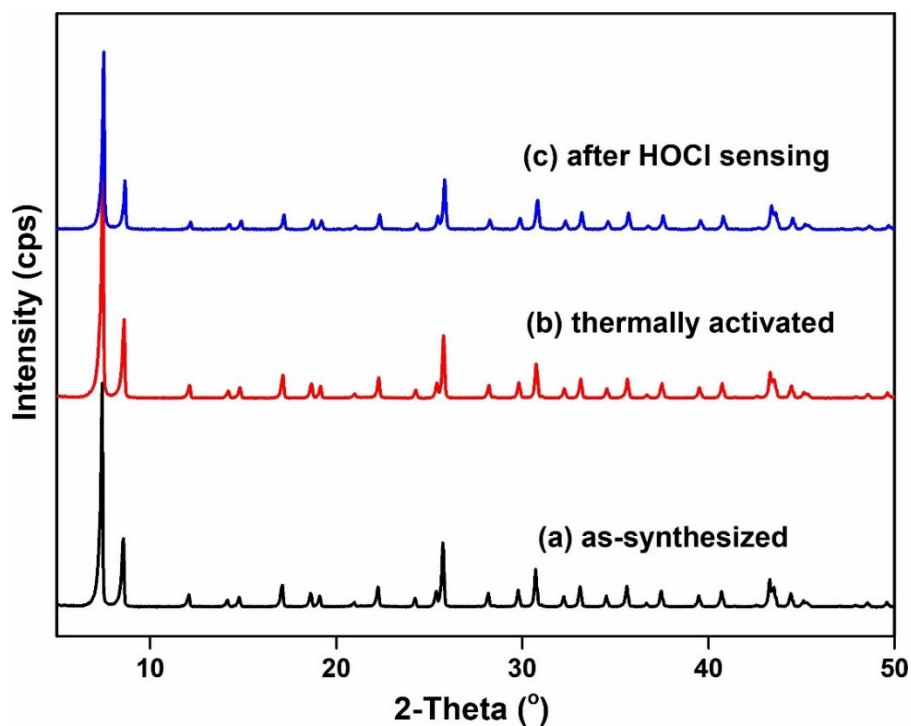

**Figure S23.** XRPD patterns of  $1$  in different forms: as-synthesized (a), thermally activated (b) and after HOCl sensing (c).



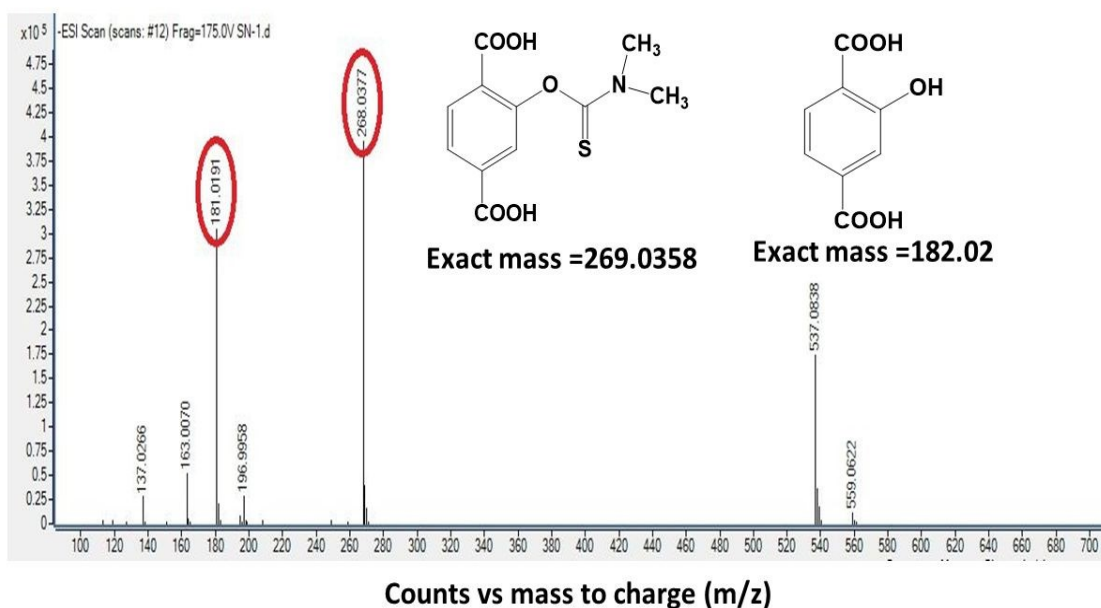

**Figure S24.** ESI-MS spectrum of HOCl treated H<sub>2</sub>BDC-DMTCM in MeOH. The spectrum shows m/z (negative ion mode) peaks at 268.0377 and 181.0191, which correspond to (M-H)<sup>-</sup>ion of H<sub>2</sub>BDC-DMTCM and HOCl mediated product (i.e. H<sub>2</sub>BDC-OH).

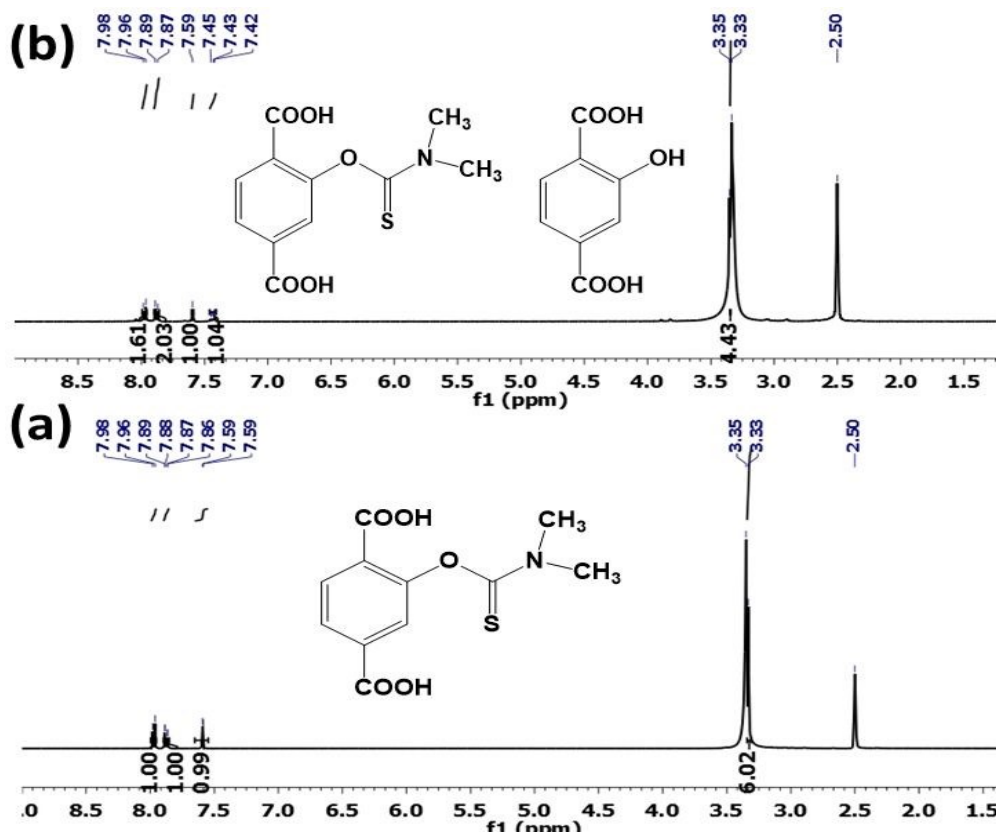

**Figure S25.** <sup>1</sup>H NMR spectrum of (a) H<sub>2</sub>BDC-DMTCM ligand and (b) HOCl-treated H<sub>2</sub>BDC-DMTCM ligand in DMSO-*d*<sub>6</sub>. New proton signals at 7.88 ppm and 7.45-7.42 ppm signifies the formation of H<sub>2</sub>BDC-OH after treatment with HOCl solution.

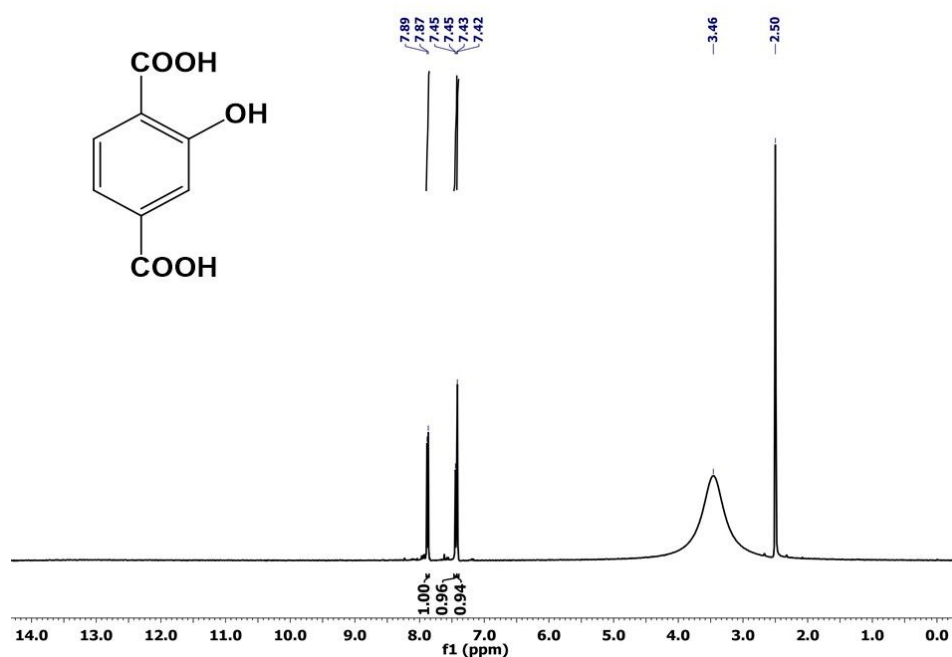

**Figure S26.** <sup>1</sup>H NMR spectrum spectrum of 2-hydroxy terephthalic acid (H<sub>2</sub>BDC-OH) ligand.

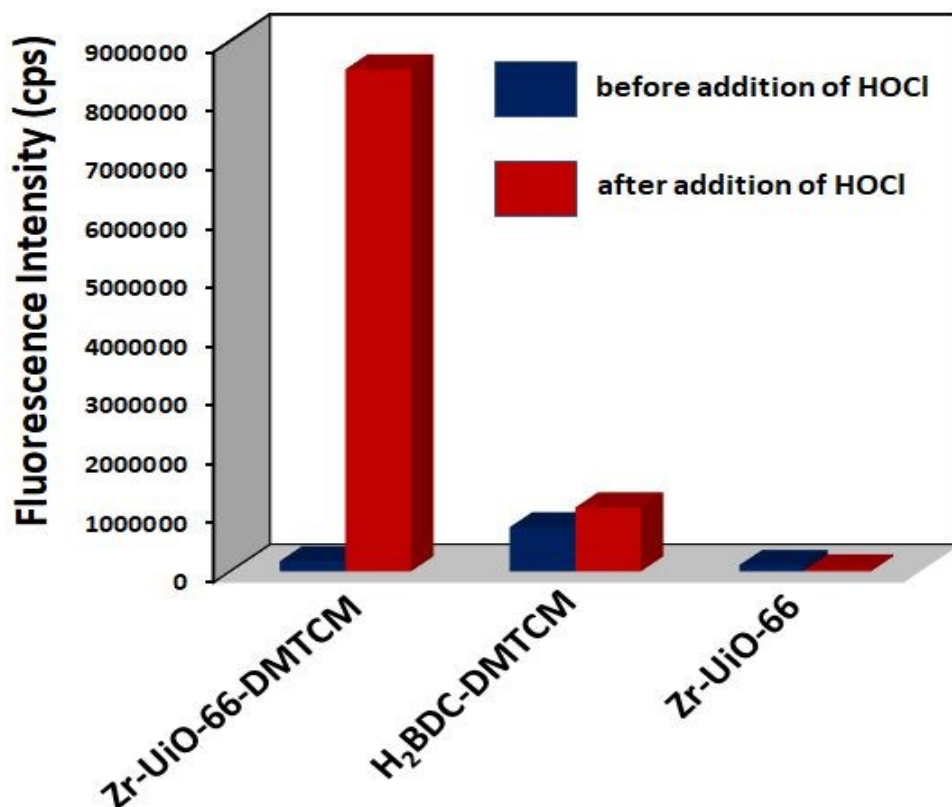

**Figure S27.** Relative fluorescence response of **1'**, H<sub>2</sub>BDC-DMTCM and unfunctionalized Zr-UiO-66 towards 1 mM HOCl (500 µL) in aqueous medium.

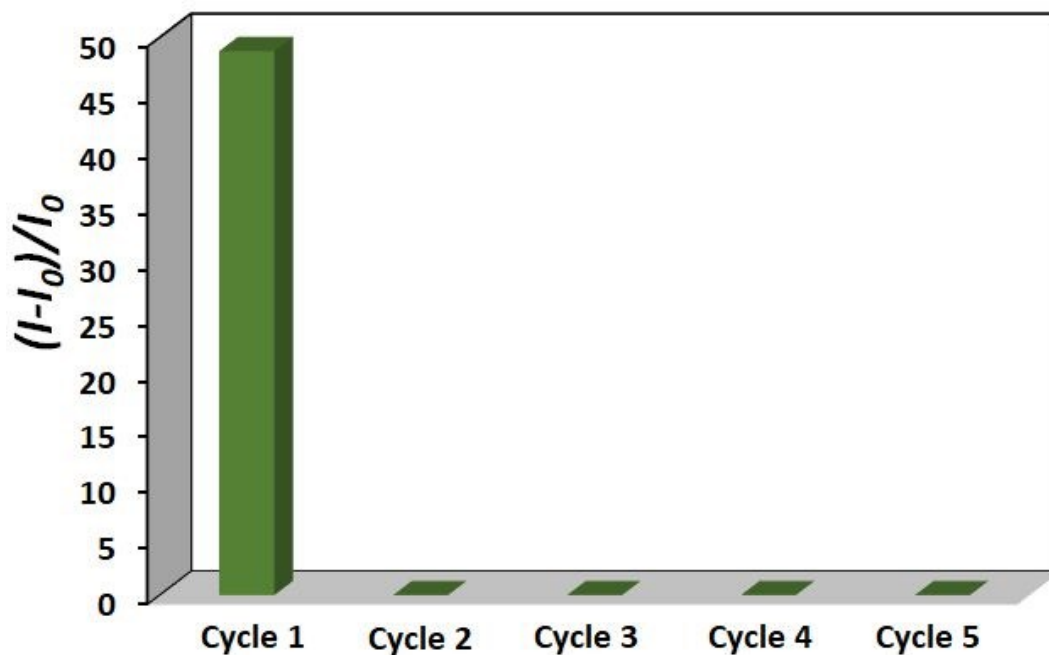

**Figure S28.** Recyclability test for the fluorescence turn-on response of **1'** towards HOCl solution.

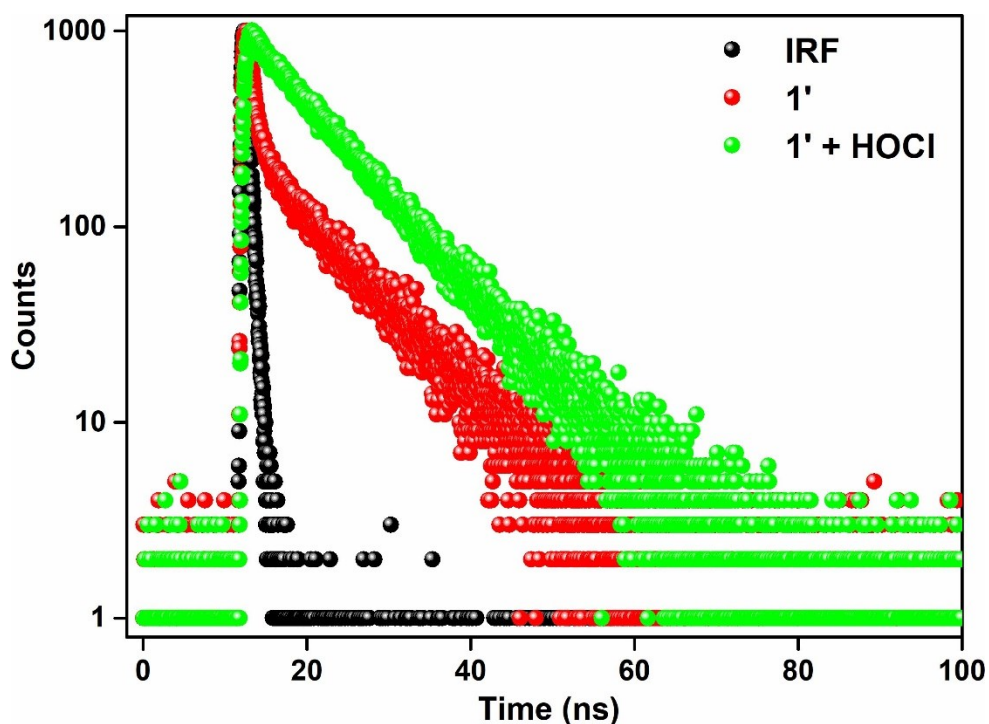

**Figure S29.** Lifetime decay profiles of aqueous suspension of **1'** in absence and presence of HOCl solution ( $\lambda_{\text{ex}} = 290 \text{ nm}$ , monitored at  $425 \text{ nm}$ ).

**Table S1.** Comparison of the sensing performance of various sensors of HOCl.

| Sl. No. | Sensor                      | Type of Material | Sensing Medium                                           | Mode of Detection       | Detection Limit  | Response Time | Ref.      |
|---------|-----------------------------|------------------|----------------------------------------------------------|-------------------------|------------------|---------------|-----------|
| 1       | Zr-UiO-66-DMTCM)) (1)       | MOF              | Water                                                    | Fluorescence “Turn-on”  | 1.22 $\mu$ M     | Second        | this work |
| 2       | UiO-68-ol                   | MOF              | PBS buffer                                               | Fluorescence “Turn-off” | $10^{-7}$ M      | Second        | 2         |
| 3       | Eu-BDC-NH <sub>2</sub> /DPA | MOF              | -                                                        | Ratiometric             | 37 nM            | Second        | 3         |
| 4       | Flu-1                       | Organic molecule | DMSO–H <sub>2</sub> O                                    | Fluorescence “Turn-on”  | -                | Second        | 4         |
| 5       | Naph-1 and Naph-2           | Organic molecule | PBS buffer                                               | Fluorescence “Turn-on”  | 37 nM and 8.2 nM | 1 min         | 5         |
| 6       | rTP-HOCl 1                  | Organic molecule | PBS buffer                                               | Ratiometric             | 34.8 nM          | Second        | 6         |
| 7       | HySOx                       | Organic molecule | Sodium phosphate buffer containing 20% DMF               | Fluorescence “Turn-on”  | -                | Second        | 7         |
| 8       | Compound 1                  | Organic molecule | 0.1M potassium phosphate buffer<br>pH 9.0/DMF (v/v, 1:4) | Fluorescence “Turn-off” | -                | 3 min         | 8         |
| 9       | FBS                         | Organic molecule | KH <sub>2</sub> PO <sub>4</sub> buffer (50 mM, pH 7.4)   | Fluorescence “Turn-on”  | 0.2 $\mu$ M      | -             | 9         |
| 10      | TP-HOCl 1                   | Organic molecule | PBS buffer                                               | Fluorescence “Turn-on”  | 16.6 nM          | Second        | 10        |
| 11      | PMOPP                       | Organic          | PBS solution                                             | Fluorescence “Turn-     | 0.8 $\mu$ M      | -             | 11        |

|    |                                                               |                  |                                          |                                      |               |         |    |
|----|---------------------------------------------------------------|------------------|------------------------------------------|--------------------------------------|---------------|---------|----|
|    |                                                               | molecule         | (pH=7.4, 0.01 M)                         | off <sup>a</sup>                     |               |         |    |
| 12 | L1                                                            | Organic molecule | PBS buffer                               | Fluorescence “Turn-off”              | 0.674 $\mu$ M | 2.5 min | 12 |
| 13 | [Ir(ppy) <sub>2</sub> (L <sub>1</sub> )](PF <sub>6</sub> )(1) | Metal complexes  | DMF–HEPES (50 mM, pH = 7.2, v/v = 4 : 1) | Fluorescence “Turn-on”               | 1 ppm         | -       | 13 |
| 14 | PDA@ERGO/GC                                                   | Electrode        | Water                                    | Electrochemical                      | 44 nM         | -       | 14 |
| 15 | BDD                                                           | Electrode        | Water                                    | Electrochemical                      | 8.3 $\mu$ M   | -       | 15 |
| 16 | AgCl/Ag <sub>2</sub> O films                                  | Electrode        | Water                                    | Electrochemical                      | 2 ppm         | 60 s    | 16 |
| 17 | CuO-NPs@MWCNT                                                 | Nanocomposite    | PBS                                      | Electrochemical                      | 0.7 $\mu$ M   | -       | 17 |
| 18 | Poly MnTAPP-nano Au GCE                                       | Electrode        | NaOH/H <sub>2</sub> O                    | Electrochemical                      | 24 $\mu$ M    | -       | 18 |
| 19 | <i>o</i> -tolidinium dichloride                               | Organic molecule | Buffer solution                          | Spectrophotometric                   | 0.08 ppm      | -       | 19 |
| 20 | Acetylcholine esterase                                        | Enzyme           | Water                                    | Potentiometric                       | 0.01 mM       | 20 min  | 20 |
| 21 | Styrene                                                       | Organic molecule | Water                                    | Gas chromatography/mass spectrometry | 0.1 $\mu$ M   | -       | 21 |
| 22 | Poly(luminol) reagent film                                    | Thin film        | Water                                    | Chemiluminescence                    | 0.5 $\mu$ M   | -       | 22 |
| 23 | Glassy carbon electrode                                       | Electrode        | Soil                                     | Chronoamperometric                   | -             | 2 s     | 23 |

**Table S2.** Unit cell parameters of the as-synthesized Zr-UiO-66-DMTCM MOF (**1'**). The obtained values are compared with the previously reported Zr-UiO-66 MOFs.

|                               |                                   |                                        |                                                                           |                                                               |                                                                   |
|-------------------------------|-----------------------------------|----------------------------------------|---------------------------------------------------------------------------|---------------------------------------------------------------|-------------------------------------------------------------------|
| Compound Name                 | Zr-UiO-66-DMTCM MOF ( <b>1'</b> ) | Zr-UiO-66-MOF (reported) <sup>24</sup> | Zr-UiO-66-(OCOCH <sub>3</sub> ) <sub>2</sub> MOF (reported) <sup>25</sup> | Zr-UiO-66-NH-CH <sub>2</sub> -Py MOF (reported) <sup>26</sup> | Zr-UiO-66-1-(aminomethyl)naphthalen-2-ol (reported) <sup>27</sup> |
| Crystal System                | cubic                             | cubic                                  | cubic                                                                     | cubic                                                         | cubic                                                             |
| a = b = c (Å)                 | 20.8029 (7)                       | 20.7004 (2)                            | 20.840(7)                                                                 | 20.755(3)                                                     | 20.786(3)                                                         |
| $\alpha = \beta = \gamma$ (°) | 90                                | 90                                     | 90                                                                        | 90                                                            | 90                                                                |
| V (Å <sup>3</sup> )           | 9002.5 (5)                        | 8870.3(2)                              | 9051.7(5)                                                                 | 8940.3(21)                                                    | 8981.1(19)                                                        |

**Table S3.** Calculation of detection limit for HOCl detection by **1'**.

| Number of Run (n) | Fluorescence Intensities at 425 nm before addition of HOCl | Standard Deviation ( $\sigma$ ) | Slope ( $k$ ) (mM <sup>-1</sup> ) | Detection Limit ( $3\sigma/k$ ) (mM)    |
|-------------------|------------------------------------------------------------|---------------------------------|-----------------------------------|-----------------------------------------|
| 1                 | 181704.19511                                               | 894.18                          | $2.20 \times 10^6$                | $1.22 \times 10^{-3}$<br>(1.22 $\mu$ M) |
| 2                 | 182786.60313                                               |                                 |                                   |                                         |
| 3                 | 184394.7706                                                |                                 |                                   |                                         |
| 4                 | 183999.40793                                               |                                 |                                   |                                         |
| 5                 | 182430.22763                                               |                                 |                                   |                                         |
| 6                 | 182813.79891                                               |                                 |                                   |                                         |
| 7                 | 182277.7180                                                |                                 |                                   |                                         |
| 8                 | 181902.77905                                               |                                 |                                   |                                         |

**Table S4.** Fluorescence lifetimes of aqueous suspension of **1'** before and after the addition of HOCl solution ( $\lambda_{\text{ex}} = 290$  nm, pulsed diode laser).



| Volume of 1 mM HOCl solution added ( $\mu\text{L}$ ) | $a_1$ | $a_2$ | $\tau_1$ (ns) | $\tau_2$ (ns) | $\langle\tau\rangle^*$ (ns) | $\chi^2$ |
|------------------------------------------------------|-------|-------|---------------|---------------|-----------------------------|----------|
| 0                                                    | 0.46  | 0.54  | 0.55          | 8.43          | 4.80                        | 1.01     |
| 500                                                  | 0.04  | 0.96  | 1.07          | 9.04          | 8.72                        | 1.02     |

$$* \langle\tau\rangle = a_1\tau_1 + a_2\tau_2$$

## References:

1. P.-T. Skowron, M. Dumartin, E. Jeamet, F. Perret, C. Gourlaouen, A. Baudouin, B. Fenet, J.-V. Naubron, F. Fotiadu, L. Vial and J. Leclaire, *J. Org. Chem.*, 2016, **81**, 654-661.
2. Y.-A. Li, S. Yang, Q.-Y. Li, J.-P. Ma, S. Zhang and Y.-B. Dong, *Inorg. Chem.* 2017, **56**, 2017, **56**, 13241-13248.
3. Y.-Q. Sun, Y. Cheng and X.-B. Yin, *Anal. Chem.*, 2021, doi.org/10.1021/acs.analchem.1020c05040.
4. X. Cheng, H. Jia, T. Long, J. Feng, J. Qin and Z. Li, *Chem. Commun.*, 2011, **47**, 11978-11980.
5. Y. Jiang, G. Zheng, Q. Duan, L. Yang, J. Zhang, H. Zhang, J. He, H. Sun and D. Ho, *Chem. Commun.*, 2018, **54**, 7967-7970.
6. Y. W. Jun, S. Sarkar, S. Singha, Y. J. Reo, H. R. Kim, J.-J. Kim, Y.-T. Chang and K. H. Ahn, *Chem. Commun.*, 2017, **53**, 10800-10803.
7. S. Kenmoku, Y. Urano, H. Kojima and T. Nagano, *J. Am. Chem. Soc.*, 2007, **129**, 7313-7318.
8. J. Shi, Q. Li, X. Zhang, M. Peng, J. Qin and Z. Li, *Sens. Actuators, B*, 2010, **145**, 583-587.
9. Q. Xu, K.-A. Lee, S. Lee, K. M. Lee, W.-J. Lee and J. Yoon, *J. Am. Chem. Soc.*, 2013, **135**, 9944-9949.
10. L. Yuan, L. Wang, B. K. Agrawalla, S.-J. Park, H. Zhu, B. Sivaraman, J. Peng, Q.-H. Xu and Y.-T. Chang, *J. Am. Chem. Soc.*, 2015, **137**, 5930-5938.
11. W. Zhang, C. Guo, L. Liu, J. Qin and C. Yang, *Org. Biomol. Chem.*, 2011, **9**, 5560-5563.
12. B. Zhang, X. Yang, R. Zhang, Y. Liu, X. Ren, M. Xian, Y. Ye and Y. Zhao, *Anal. Chem.*, 2017, **89**, 10384-10390.
13. N. Zhao, Y.-H. Wu, R.-M. Wang, L.-X. Shi and Z.-N. Chen, *Analyst*, 136, **2011**, 2277-2282.
14. D. R. Kumar, S. Kesavan, T. T. Nguyen, J. Hwang, C. Lamiel and J.-J. Shim, *Sensors and Actuators B: Chemical*, 2017, **240**, 818-828.
15. M. Murata, T. A. Ivandini, M. Shibata, S. Nomura, A. Fujishima and Y. Einaga, *J. Electroanal. Chem.*, 2008, **612**, 29-36.
16. M. Jović, F. Cortés-Salazar, A. Lesch, V. Amstutz, H. Bi and H. H. Girault, *J. Electroanal. Chem.*, 2015, **756**, 171-178.
17. J. Muñoz, F. Céspedes and M. Baeza, *Microchem. J.*, 2015, **122**, 189-196.
18. S. Thiagarajan, Z.-Y. Wu and S.-M. Chen, *J. Electroanal. Chem.*, 2011, **661**, 322-328.
19. D. J. Leggett, N. H. Chen and D. S. Mahadevappa, *Analyst*, 1982, **107**, 433-441.

20. A. P. Soldatkin, D. V. Gorchkov, C. Martelet and N. J. Renault, *Sens. Actuators B*, 1997, **43**, 99-104.
21. K. Wakigawa, A. Gohda, S. Fukushima, T. Mori, T. Niidome and Y. Katayama, *Talanta*, 2013, **103**, 81-85.
22. M. Szili, I. Kasik, V. Matejec, G. Nagy and B. Kovacs, *Sens. Actuators B*, 2014, **192**, 92-98.
23. L. Kiss, B. Kovacs and G. Nagy, *J. Solid State Electrochem.*, 2015, **19**, 261-267.
24. J. H. Cavka, S. Jakobsen, U. Olsbye, N. Guillou, C. Lamberti, S. Bordiga and K. P. Lillerud, *J. Am. Chem. Soc.*, 2008, **130**, 13850-13851.
25. S. Nandi, M. SK and S. Biswas, *Dalton Trans*, 2020, **49**, 2830-2834.
26. A. Das, N. Anbu, M. SK, A. Dhakshinamoorthy and S. Biswas, *Dalton Trans.*, 2019, **48**, 17371-17380.
27. A. Das, N. Anbu, M. SK, A. Dhakshinamoorthy and S. Biswas, *ChemCatChem*, 2020, **12**, 1789-1798.
